# Supplementary material for: NF-κB modifies the mammalian circadian clock through interaction with the core clock protein BMAL1
Source: PubMed Central journal article supplement (PMC8648109; doi:10.1371/journal.pgen.1009933), 2021-11-22
Supplement: pgen.1009933.s008.pdf [file pgen.1009933.s008.pdf]

# S1 Table

## The E-box and NF-kB-RE motifs within the binding peaks of BMAL1, CLOCK and RELA in ChIP-seq data

**Peak info:** PeakID, Chromosome #, Start seq, End seq, Strand, Peak Score, Focus Ratio/Region Size, Annotation, Detailed Annotation, Distance to TSS, Nearest PromoterID, Entrez ID, Nearest Unigene, Nearest Refseq, Nearest Ensembl, Gene Name, Gene Alias, Gene Description, Peak nucleotide sequence. Motif search was done using the JASPAR program with a relative profile score threshold of 85% or above. **Red**, NF-kB-RE. **Green**, E-box.

### A. NF-kB targets via NF-kB-RE

#### *Nfkb1*

Merged-chr3-135670787-1 chr3 135670696 135670878 + 37.400002 p65 intron (NM\_008689, intron 1 of 24) NA 20760 NM\_008689 18033 Mm.256765 NM\_008689 ENSMUSG00000028163 Nfkb1 NF-KB1|NF-kappaB|NF-kappaB1|p105|p50|p50/p105 nuclear factor of kappa light polypeptide gene enhancer in B cells 1, p105

TTGCAAAAGCAAGTTTATACCTAAAATGTTGAAATATCGACTAAGCTTTGGAGCTGGGGATGAGAAAGCAGTGGGAAAGTCCCTTATGTACCCCTGCTTTCTCAGCCTTGCCCCACTTTCTTTTGTGCTTTTGAGGAAGGACCTTGAGACACAAAGGGAGACACAAGCCTGGGTCTCATT

#### *Nfkbia*

Merged-chr12-55492723-1 chr12 55492632 55492814 + 63.5 p65 promoter-TSS (NM\_010907) NA -76 NM\_010907 18035 Mm.170515 NM\_010907 ENSMUSG00000021025 Nfkbia A1462015|Nfkb1 nuclear factor of kappa light polypeptide gene enhancer in B cells inhibitor, alpha

GGCAGGGGATTTCTCAGGGCGGGGTGTCAGGCGCGGGGAATTTCCAGCCAGTCAGACTAGAAAAAGAACTGGCTCGTCCCTCCACTGAGAAGCCTAAACCCAGGGCCGGGGTTCATCGGAGAACTCCCTGCGATGAGCCACTGGGGTTCATGCACAGGAACTTTTGTATGAGCCCTGAGTGG

Merged-chr12-55491939-1 chr12 55491848 55492030 + 72.900002 p65 TTS (NR\_035430) NA 708 NM\_010907 18035 Mm.170515 NM\_010907 ENSMUSG00000021025 Nfkbia A1462015|Nfkb1 nuclear factor of kappa light polypeptide gene enhancer in B cells inhibitor, alpha

GGAGGTGGGGTTGGAGGGGGATTCGCAAGGCCGGGGTTTCTGGAGCCGCGCGCGGTGTTTTCCGCGAGGTTATTATGAGCTGAGTGTTCCTGGCAGCCGCC CAGGGACTTCCGTGCCCCACCCCTCCGGCGGGCGCCGGCCAGACCGCCCGCCCTCCGCGCCCGGAACGCC

### B. BMAL1/CLOCK targets via E-box

#### *Ccne1*

Merged-chr7-38085213-2 chr7 38085121 38085306 + 123.450005 Clock|Bmal1 Intergenic CpG 22277 (NM\_007633 12447 Mm.16110 NM\_007633 ENSMUSG0000002068 Ccne1 AW538188|CycE1 cyclin E1

GCAGCCGAGAGGACATGGGGCGGGGACAGGGGCGGGGTTCGGATCGGAGCGGAGGCTGGGTGGGCGGGCCCTGGAGTCACTGTGTAACACGCGCCACGTGGAGCTCAGCCTGAGCCAGAAGGCGGGGCTGCGGGTTCGAAGGAGGAGGCGGGTAAGGTGCGCGCGCGCGCATGGAG

#### *Atxn3*

Merged-chr12-101958288-2 chr12 101958179 101958398 + 67.949997 Clock|Bmal1 promoter-TSS (NM\_001167914) NA -45 NM\_029705 110616 Mm.271914 NM\_029705 ENSMUSG00000021189 Atxn3 2210008M02Rik|A1463012|A1647473|ATX3|MJD1|Mjd|Sca3|ataxin-3 ataxin 3

GCCCCGGCGGGAGCAGCCCCCTCCAGCAGCTCCGCCCCGGCCCCACCCCTCAGCCCCGGTCCGCCCCGCCCTAGCCACGTGCTCTCGCCAACCAATCACTACTGCGGGCGCAGTCAAGGACGACGCGAACCCGGGAGCACGGACACGTGACCTGGGCGGGCTTGGTCTCCCGCGCAAGCGTGTGCTGCGGGCGCCGCTGCTGTGCGGAGG

### C. Clock genes regulated by BMAL1/CLOCK via E-box and by NF-kB via NF-kB-RE

#### *Per1*

Merged-chr11-69094874-3 chr11 69094771 69094986 + 115.666664 p65|Clock|Bmal1 Intergenic Intergenic -4078 (NM\_011065 18626 Mm.7373 NM\_011065 ENSMUSG00000020893 Per1 Per|m-rigui|mPer1 period circadian clock 1

CCTGCGTACAAGTCGCTCGGCACGCTGCGCAGACTCCGCGAGTATTGGGTAAGTGTGCTCAAGGAAAATCCCCAGCTTCTGGGTAAACAAGTTGCCGCGTGAGCCA GCTGACAGTGTCCCTACAGCTCTGAGCCCTCTCAGCCTATGAGAAAGTTTTAGGGCAGGGCTGGCATTTCGCTCACTGATTTAGGCAGGGCGGGTGTCTCTGCA

Merged-chr11-69098809-2 chr11 69098703 69098915 + 114.699997 Clock|Bmal1 promoter-TSS (NM\_011065) NA -147 NM\_011065 18626 Mm.7373 NM\_011065 ENSMUSG00000020893 Per1 Per|m-rigui|mPer1 period circadian clock 1

GACGGTGTGAGACATCTGATCGCATTGGCTGACTGAGCGGTGTCTGAGGCCCTTACGCCAGCACCAGCACCACCAAGTCCACGTGCAAGGATGTGTGTGACACAGC  
CCTGACCTCAGTGGGGGCCAGTAGCCAATCAGATGCCAGGAAGAGATCCTTAGCCAACCGGGGGCGGGGCTTCCGGCAGAAAGGCCAATGAGGGGCAG

## Per2

Merged-chr1-91459395-3 chr1 91459274 91459506 + 122.003334 p65|Clock|Bmal1 promoter-TSS  
(NM\_011066) promoter-TSS (NM\_011066) -62 NM\_011066 18627 Mm.482463 NM\_011066  
ENSMUSG00000028976 Per2 mKIAA0347|mPer2 period circadian clock 2

CGCTGCCCGCGCTCGCCCTCCGCTGTACATAGTGGAAAACGTGACCGCGCGCGCTGAGCCCGCCCTGCGCGCGCCATTGGTTCGGAGTGCCACCTCATTTCAT  
ACTGGCGGGCGGAACCTGAGAGCTACGCTCATCAATTGGTGGAGACGCCCGCTCGCTCTCTTTACATAAGACGCACATGGAACTCCAATGTTCCGCCCGCCGGTTC  
TCAATGAAGATGCTGCGCGC

Merged-chr1-91456120-1 chr1 9145602991456211+ 18.700001 p65 intron (NM\_011066, intron 1 of 22)  
NA 3208 NM\_011066 18627 Mm.482463 NM\_011066 ENSMUSG00000055866 Per2  
mKIAA0347|mPer2 period circadian clock 2

TCGCTTTCCTCAGCCAGACAGAGAAAAGAGCCCTGGGTGATGAGATCATGGGTCTGGGTGGGGAGGGGTACCCAGGCTGGTCTGGGAGTTCACAGTATTGC  
TCTCTCAGCCTCTGCAGCTAGCTACACTTTCACAAAGAAATGGTTAAAAACACAGCAAGCCAGATGACAAAACAG

## D. Clock genes regulated by coordinated actions of BMAL1/CLOCK and NF-kB via E-box only

### Dbp

Merged-chr7-45704969-3 chr7 4570485045705083+ 152.96666 p65|Clock|Bmal1 promoter-TSS (NM\_016974)  
promoter-TSS (NM\_016974) -281 NM\_016974 13170 Mm.24222 NM\_016974  
ENSMUSG00000059824 Dbp - D site albumin promoter binding protein

AAGTGGGTACAGGTCACCGCTCCGCTCCAGCGCTCCTCCCATTTGGCCAAATATAGGTGAGTGTCCCGCTTCTTCCAAAAGGCGAGGCAACTACACAAGTTCAGCCCTC  
ACCGCTCCAGGGTCTTGGCATATCCCTTCATCTCATTGGCTGAGCGTCTCAAGGGCTCGAGACGTGATTGGTCTTCCAGAAAGCCGAGGAAGGCACGCGGT  
GGGTGATGCCCCAAGTGA

Merged-chr7-45706063-2 chr7 4570596545706161+ 139.449997 Clock|Bmal1 intron (NM\_016974, intron 1 of  
3) NA 816 NM\_016974 13170 Mm.24222 NM\_016974 ENSMUSG00000059824 Dbp -  
D site albumin promoter binding protein

GCCAGACCCCTCTTTCTTTCTTTGGCTCAGAGTCTGGACCCCTGGAGTCTTAGGGGAAGGGAGGGGGTGTGTTCGGATGCTCACAGGTCAGACACGGGCTTGG  
CGGGGCTTCGACAGGTGCAATGGAAGCTAGGGATGAGGAATGTCCCTGAGCAGTGGAGCCCTTCCAGCCCCAACAGACTGTGGGGAG

Merged-chr7-45707753-3 chr7 4570765345707852+ 272.633331 p65|Clock|Bmal1 intron (NM\_016974, intron 2 of  
3) intron (NM\_016974, intron 2 of 3) 2505 NM\_016974 13170 Mm.24222 NM\_016974  
ENSMUSG00000059824 Dbp - D site albumin promoter binding protein

GGTACACCTGTCCCTGATCCGACCTCCAGGCAAAAACAGTGTGCATTTCCCTCGCCACGTGAGTCCGCTTCTTAGTGTGCGGCACGCGCTCTCACGGCGAG  
GAGCGGGGCGGGAAACGTGCGGGTGTCTGGTTGGGGAGGAGGGGAAAGGGGAAGCTGTAGGCCACAGTGTGCGGCCCTGAATGGTGTCT

### Per3

Merged-chr4-151044770-3 chr4 151044631 151044898 + 99.816666 p65|Clock|Bmal1 promoter-  
TSS (NM\_011067) promoter-TSS (NM\_011067) -99 NM\_011067 18628 Mm.121361 NM\_011067  
ENSMUSG00000028957 Per3 2810049006Rik|mPer3 period circadian clock 3

CAGAGCTCGCCACCCGCGGGCAGTCCAGTCTCGAGGCCGTCGCGTGCAGTGGCCGCGCCCGCCCGCCCTGCGCGCCAGGGATCCGGTCCCGCCCTTCCG  
CGCGGATTGGTTCGCTGTTACCGGCAACACGAGCTCCCATTTGGTTCAGAGGGCGGGTGCAGGTCTGTGCACGCGGGGGTTACATAACCGCGGGGGTGGCGGGG  
GCAAAGGCCCCGAGTACCTTACATAACCGCGGGTTCGGCGAGGGCGGCTCTCG

### Cry1

Merged-chr10-85185299-3 chr10 8518498085185421+ 103.053329 p65|Clock|Bmal1 promoter-TSS (NM\_007771)  
NA -244 NM\_007771 12952 Mm.26237 NM\_007771 ENSMUSG00000020038 Cry1  
AU020726|AU021000|Phil1 cryptochrome 1 (photolyase-like)

AGCGCGGGCTAGAGTCCAGGCCGCGGGACGCTCGCTGCGGGTCCCGTCCCGAGGCTGCCCGGGTACTCCGCCGCTCAGCGGCCCTCCGCCCGCCCGCCG  
TTCTCATTGGGGCGGCATGCAACCCACGTGACCCCGCACTCACGTTCTGTAAGTGTGTTTACTACACTGGCTCAGACCCCGCGTGCAGCGCCCGCGCCGGTGC  
TTCCGGACCGGTTGCGATCGCTGGGCGCTCAGACCTGAGTCTCGCGTGGGATCCGGACTCGCAGCCTCTCGGGTCTCTGAGCCCGAGCCGCTCGCGGGG  
ACAGGCCGCGAGAAGGGGGAGGAGGCATAGTCTGCTCCCGGGGCGGGAGCCGCTCCATTGGCCGAGGCTCGCGGGGACCCGATGAGCACGGGGTTCGGGG  
GCTCGCGGGCGCGCT

### Cry2

Merged-chr2-92423909-2 chr2 92423802 92424017 + 131.100006 Clock|Bmal1 intron (NM\_009963, intron 3 of 11)  
NA 10160 NM\_009963 12953 Mm.254181 NM\_009963 ENSMUSG00000068742 Cry2  
AV006279|D130054K12Rik cryptochrome 2 (photolyase-like)

GTGCTGCCCCATTAGCCAGATAGGAGCTGGCTGCTGCCTCTGAGTCCCTGCCCTCCCTGGCACGTGGCAGGGGAAGGGCTCCACAGCAAGCCTCTCTCTCTG  
AGGGCTTGGCTCACGTGACAGCTGTGTGACCCAGCCTCTGGCAGCCAGCCCTGGTGGGAGGAGGGCAGGGAGCAGTAGCAGCTACAGAGGTGGCATCTCTA  
GTA

### Nr1d1

Merged-chr11-98773066-2 chr11 98772972 98773160 + 134.30003 Clock|Bmal1 intron (NM\_145434, intron 1 of 7) NA 2311 NM\_145434 217166 Mm.390397 NM\_145434 ENSMUSG00000020889 Nr1d1 A530070C09Rik|R75201 nuclear receptor subfamily 1, group D, member 1

CACCTCTGCCAAGTACTTAGCTGGCCGGCCATGGGTGGAGTGGGGAAAGGGGAGGATCCTCAGACACGTGTGTGAGGTGACACATGCCATGCCACCGAGTCGACA GAAGCACATGTCTTGTCTACCCACTGACACACACTAAACCAGGCAGGGCAACCTTAAAAATAGCTCAAGGTTGGTCAGGGTGA

Merged-chr11-98773862-3 chr11 9877374698773969+ 177.233337 p65|Clock|Bmal1 intron (NM\_145434, intron 1 of 7) CpG 1520 NM\_145434 217166 Mm.390397 NM\_145434 ENSMUSG00000020889 Nr1d1 A530070C09Rik|R75201 nuclear receptor subfamily 1, group D, member 1

TGAGAGGAAAAGAAGCCAGGCGGGGGCGGTGAGTCAGCCAGCTTACCCAGATCTAGGCGGAGAAGGGCGGGGGAGCCTGGCCCTCAGCTGGCCCTCACGTCC CCAC TCCACGTGTGCCCC TCGCACGTGGCACCCCAACGAGGAACCCCGAACTCGAAGCACCCGCTTCTCCGCTTCCCTTCTGTGCGAAGGAAAACCCCGCCCTCG CCCC GCCCTC

Merged-chr11-98775381-3 chr11 9877526298775525+ 113.599998 p65|Clock|Bmal1 promoter-TSS (NM\_145434) promoter-TSS (NM\_145434) -16 NM\_145434 217166 Mm.390397 NM\_145434 ENSMUSG00000020889 Nr1d1 A530070C09Rik|R75201 nuclear receptor subfamily 1, group D, member 1

AGCCTTTCCTGGGACAGAGGGCTCTGCGCAGGCGCCAGCAGCCAGGGTTCGGGGCCGCACGCGGCACTGGAGCAGGTAACCATGTGATTCCAGGGAGCGCCTCG TGCCCAAGTACACACTTTTCCAGCAGCCGGCACGTTGAGATCTGTGCGCTGCGCACCCGCAAGGATTGTTGGGATTTGTAGTCTACTGACAATGTAGGTGGAGTG TGCCTATTCTTTTCTGCTTTGCAAAAGTGCTTGCTGGCAGCGGGGAGGAG

### Nr1d1 peak

Merged-chr11-98783508-3 chr11 9878339698783611+ 280.100006 p65|Clock|Bmal1 Intergenic Intergenic-8126 (NM\_145434, intron 1 of 7) CpG 217166 Mm.390397 NM\_145434 ENSMUSG00000020889 Nr1d1 A530070C09Rik|R75201 nuclear receptor subfamily 1, group D, member 1

GCTGTCTTGAAGCTCACGCGGGCTGCCCGGGTTCACATGGCACGGGCATGTGCAGCCTGCCATTCTTACACAACAACCTCGCTCATAAACAGCCCGGCTGTGCG GCGGTGGCGGCGGAACATGTGCAAGTGTAGGGGGTGGGGCACGTGGCCCTGCCGAGCCAAGGGAAGGACTGGATTGCTCAGCGCTGCCCTCCACCCTGCCCGCAC TGG

### Nr1d2

Merged-chr14-18238620-3 chr14 18238503 18238735 + 219.96666 p65|Clock|Bmal1 intron (NM\_011584, intron 1 of 7) CpG 487 NM\_011584 353187 Mm.26587 NM\_011584 ENSMUSG00000021775 Nr1d2 RVR|Rev-erb nuclear receptor subfamily 1, group D, member 2

CTCCCCCGCGGCACCGCCCCACAGTGTCTCCGGCCCCGGGTAATGTGGTTCGCCCGCGGCTCCTCAGCTGTCTCCGCCGCCACCACCAGCTCGCATTATGTA ATGCTGCGTCACTCGCCGCGCAGCAACAGCGCCCGCGCCGCAAGTAAACACACCGTGCACGTGGCCAGTGGCGGAGGGCCATGTGAGGGGGCGTCCGGC GCGCGGGGAGCCCGAGTGC

### Rorc

Merged-chr3-94371815-2 chr3 9437171994371912+ 95.149994 Clock|Bmal1 promoter-TSS (NM\_011281) NA -979 NM\_011281 19885 Mm.4372 NM\_011281 ENSMUSG00000028150 Rorc Nr1f3|RORgamma|TOR|Thor RAR-related orphan receptor gamma

TGGAGAATGGAATGTGGGAGCGAAGGGACAGCTGCCTGCCCTCTCCACGCCAGGTGCCACGTGCCACCAGGTGGAGGGAGTGGGCGAGTCCAGAGCCCTGGCGTG GCCGGCTCCTGCCCTGCTGTTTACCAGCTGGAGAAAGCAGGAGGAGGGGTTGGGAGCCTCCTGCTCCAGCCTGGCCCTAGCCAGC

### Ciart/Chrono

Merged-chr3-95882288-3 chr3 9588212695882906+ 121.550003 p65|Clock|Bmal1 promoter-TSS (NM\_001033302) promoter-TSS (NM\_001033302) -44 NM\_001033302 229599 Mm.331218 NM\_001033302 ENSMUSG00000038550 Ciart Chrono|Gm129 circadian associated repressor of transcription

GGAGAGCGCTTGGCTCTCGTCCGCTTACCTGGGTCTGTGCGTTCAGCCCGGTCGGTATGACGCTTCTTCACTGTCTGTGCTGGTCTAGCCGACCCACCTCCGCCT CACTCTGTGGGTCCCGCCCTTCCCTCCAGACACGTGCGGTCTTGCACGTGCCCTCCCTCGCTACACAGACCTTGTGCTCTCATTGGATAGCTTACCGGCAA CACGTGACTCTAGATGCAGACGCTCACAGCCATTGCTACGGCACGCGGGGGCTCGGCCAATAGAGAGGCAGCCAAGTGGTGAATTGGCTGGAAGGGAAGCAGTCC ATGCTCCGCCCCTACATGCGGCTCCTCGGGTGATAAAAAAGGAGGATGGAAAAAGTGAATAAAGGAAGGGGCGAAAAGGGTGGAGCTCATAGCCTTAAATAG GACAGCACTGCGCGGGAGACGCACGGCTGGAGTGTACAGAGCGGGGCGGACCGAGGTTGGCGCTCGGGACGTGGGCCCCCTCTGAGCGCCTCCGCGCACGGGC GCAGCACGTGGGAGCCCTCAGCAACTCGTGTCCGCAACGCTGTGTGACAACGGACGTGTGACCGCGGCATCCGTTCCCTTGTGCGCGGCTCGCCCTCGTGACTCCC CACTCTTTCATCTCCCTCCTCGCCACCAAGTTGGGTGCTCCTGCCCTGCTGGGCGAGGAGGGTGGGGACTGCGGCTGGAACACCCGCTCCTCCTCGGGGCTCC CGCCGCGCAGCTTCTCCAGCCGGTCTTACATAACTTGC
