# Supplementary material for: NF-κB modifies the mammalian circadian clock through interaction with the core clock protein BMAL1
Source: PubMed Central journal article supplement (PMC8648109; doi:10.1371/journal.pgen.1009933), 2021-11-22
Supplement: pgen.1009933.s010.pdf [file pgen.1009933.s010.pdf]

**S3 Table. Q-PCR primers for ChIP-PCR**

|                     |                      |
|---------------------|----------------------|
| <i>Per2</i> E-box-F | GGAGTCGCGGCCAATG     |
| <i>Per2</i> E-box-R | CCACAGCTGCACGTATC    |
| <i>DBP</i> E-box-F  | CCTGGGCACACCTGCTC    |
| <i>DBP</i> E-box-R  | AGGAGGGATGGGAGGACTCA |
