# Supplementary material for: NF-κB modifies the mammalian circadian clock through interaction with the core clock protein BMAL1
Source: PubMed Central journal article supplement (PMC8648109; doi:10.1371/journal.pgen.1009933), 2021-11-22
Supplement: pgen.1009933.s011.pdf [file pgen.1009933.s011.pdf]

**S4 Table. Probe sequences for gel shift**

|                                  |                           |
|----------------------------------|---------------------------|
| WT1 probe E-box-top              | CGCGCAAAGCCATGTGCTTCCCCCT |
| WT1 probe E-box-bottom           | AGGGGGAAGCACATGGCTTTGCGCG |
| WT2 probe-E-box-top              | GGGACACGTGACCC            |
| WT2 probe-E-box-bottom           | GGGTCACGTGTCCC            |
| Mutant probe E-box-mutant-top    | GGGACAGCTGACCC            |
| Mutant probe E-box-mutant-bottom | GGGTCAGCTGTCCC            |
